# Supplementary material
Source: PubMed Central journal article supplement (PMC2874477)
Supplement: fj.09-149765_1.pdf [file fj.09-149765_1.pdf]

## Supplemental Data:

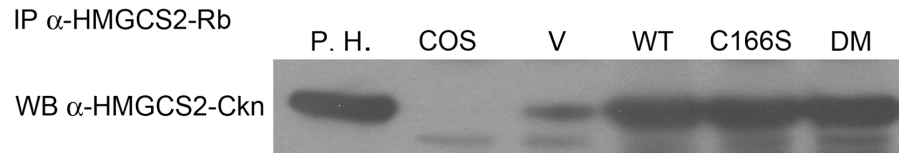

**Figure S1 Expression of HMGCS2 in COS-7 cells transfected with wildtype and mutant HMGCS2 is similar to endogenous HMGCS2 from primary hepatocytes.**

COS-7 cells transfected with 1 mg of pcDNA-HMGCS2-WT (WT), or pcDNA-HMGCS2-C166S (C166S) or pcDNA-HMGCS2-C166,305S (DM) and rat primary hepatocytes were immunoprecipitated with an anti-HMGCS from rabbit ( $\alpha$ -HMGCS-Rb, our laboratory stock) antibody followed by SDS-PAGE and transfer to a PVDF membrane and probed with anti-HMGCS2 from ckicken ( $\alpha$ -HMGCS2-Ckn, Abcam). Please note a portion of the WT sample likely leaked from the sample well and contaminated the vector lane (V), which is normally devoid on any signal as seen in figure 5B.

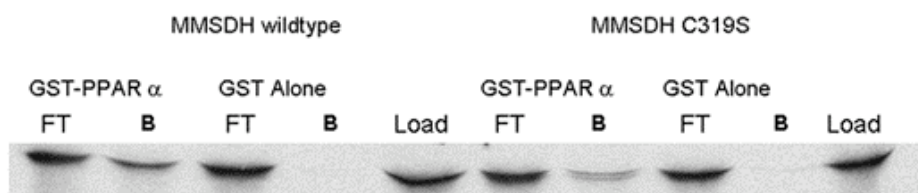

**Figure S2 Comparison of the PPAR $\alpha$  binding capabilities of wild-type MMSDH and palmitoylation deficient MMSDH C319S**

A) *In vitro* transcribed and translated wildtype or palmitoylation deficient C319S mutant were incubated with 1 mg of GST/PPAR $\alpha$  pre-bound to glutathione sepharose beads or GST sepharose alone as shown, followed by SDS-PAGE. The fluorogram of the dried gel representing 10 % of the flow through (FT) or the PPAR $\alpha$  bound protein (B) is shown.

|                                                      |
|------------------------------------------------------|
| 3-ketoacyl-CoA thiolase                              |
| Methylmalonate-semialdehyde dehydrogenase            |
| Similar to Aldehyde dehydrogenase family 7 member A1 |
| Enoyl-CoA hydratase                                  |
| Electron transfer flavoprotein subunit alpha         |
| Aspartate aminotransferase                           |
| Malate dehydrogenase                                 |
| Heat shock protein 75 kDa                            |
| 3-hydroxy-3-methylglutaryl-CoA synthase              |

**Table S1. Palmitoylated mitochondrial proteins identified in Kostiuk et al. (26) and various *in situ* palmitoylated protein proteomics studies (31-33).**

| <b>Protein name</b>                              | <b>SwissProt # or<br/>NCBI ID</b> | <b>MW<br/>(kDa)</b> | <b>NR box<br/>sequence</b> | <b>Residue #</b> |
|--------------------------------------------------|-----------------------------------|---------------------|----------------------------|------------------|
| Malate dehydrogenase                             | P04636                            | 36                  | LSLLL                      | 40-44            |
| Methylmalonate-<br>semialdehyde<br>dehydrogenase | Q02253                            | 58                  | LAKLL                      | 221-225          |
| Hydroxymethylglutaryl-<br>CoA synthase           | P22791                            | 56                  | LASLL                      | 390-394          |
| Enoyl-CoA hydratase                              | P14604                            | 32                  | LRALL                      | 4-8              |
| Dimethylglycine<br>dehydrogenase                 | Q63342                            | 96                  | LFPLL                      | 165-169          |
| Aldehyde dehydrogenase                           | P11884                            | 57                  | LSRLL                      | 15-19            |
| Alanine--glyoxylate<br>aminotransferase 2        | Q64565                            | 57                  | LSALL                      | 151-155          |
| Alpha-methylacyl-CoA<br>racemase                 | P70473                            | 42                  | LGILL                      | 162-166          |

**Table S2 Palmitoylated mitochondrial proteins containing LXXLL nuclear receptor binding motifs**

## Supplemental Data Materials and Methods

### Plasmids

C-terminal hexa-His tagged versions of the mature cDNA for human mHMG-CoA synthase (HMGCS2-His<sub>6</sub>), were constructed in the bacterial expression vector pET19b (Novagene) and have been described previously(26) pSG5PPAR $\alpha$  and pGEX-GST/PPAR $\alpha$  were a kind gift from Dr. John Capone, McMaster University, Canada. To produce the cysteine to serine mutants of HMGCS2-His<sub>6</sub>, site directed mutagenesis was performed using the Stratagene Quickchange II site directed mutagenesis kit with the following primers:

#### Cys166Ser mutation

5' GAT ACC ACC AAT GCC TCC TAC GGT GGT ACT GCC

5' GGC AGT ACC ACC GTA GGA GGC ATT GGT GGT ATC

#### Cys305Ser mutation

5' C TTT CAT ACA CCC TTT TCC AAG ATG GTC CAG AAG TCT CTG G

5' C CAG AGA CTT CTG GAC CAT CTT GGA AAA GGG TGT ATG AAA G

**Cys166,305Ser double mutation** the pET19b- HMGCS-His<sub>6</sub>-C166S vector was subjected to site directed mutagenesis with the above primers for C305S mutation.

The bases that were exchanged resulting in the substitution of the original codon encoding for a cysteine residue to a codon encoding for a serine residue are underlined.

All vectors were sequenced by MWG Biotech Inc. (Huntsville, AL 35805 USA) prior to protein expression. The HA tagged pCDNA-HMGCS2-HA wildtype and mutant plasmids for expression in COS-7 cells were engineered by PCR using the HMGCS2 coding region from the pET19b plasmids as templates with the following primers:

**Forward** 5'AAGCTTCGAATTCATG CAG CGT CTG TTG ACT CCA GTG AAG CGC

**Reverse 5'** ACTTCGGATCCTTA AGC GTA ATC TGG AAC ATC GTA TGG GTA GAC  
GGG ACG CCG GGC ATA CTT TCG

Amplified PCR products were cut with BamH1 and EcoR1 and sub cloned in appropriately digested pCDNA 3.1- plasmid.

### **Mass spectrometry analysis of HMGCS2WT and mutants.**

#### **Chemicals**

Ammonium bicarbonate ( $\text{NH}_4\text{HCO}_3$ ), Iodoacetamide (for carbamidomethylation of free thiols), dithiothreitol (DTT), N-ethylmaleimide (NEM), alpha-cyano-4-hydroxycinnamic acid (4-HCCA), universal matrix (1:1 mixture of 4-HCCA and 2,5 dihydroxybenzoic acid (DHB)) and trifluoroacetic acid were purchased from Sigma-Aldrich Canada (Oakville, ON) and used without further purification. Deuterated NEM (NEM-d5) was purchased from Cambridge Isotopes (MA, USA). Solvents were from Fisher Scientific Canada (Milton, ON) and of HPLC grade.

#### **Reduction, alkylation and digestion of proteins**

Approximately 5  $\mu\text{g}$  of WT HMGCS-His<sub>6</sub> and mutants (palmitoylated or non-palmitoylated) in a volume of 5  $\mu\text{l}$  buffer was reduced with 2.5  $\mu\text{l}$  80 mM DTT and kept at 37°C for 30 min. This step was followed with adding a 2.5  $\mu\text{l}$  volume of alkylating reagent (iodoacetamide, NEM or NEM-d<sub>5</sub>) at a concentration of 200 mM. After addition of the alkylation reagent the samples were kept at room temperature (RT) for 1 hour in the dark. Subsequently the pH was elevated with addition of 1  $\mu\text{l}$  of 1M  $\text{NH}_4\text{HCO}_3$  and 0.5  $\mu\text{l}$  of a 2 $\mu\text{g}/\mu\text{l}$  enzyme solution in dd. H<sub>2</sub>O was added. The sample was then incubated at RT overnight.

## **Mass spectrometric analysis of tryptic and chymotryptic peptides**

For peptide mapping and fragmentation analysis with matrix-assisted laser desorption/ionization time-of-flight mass spectrometry (MALDI TOF MS/MS), each peptide digestion mixture was purified with a  $\mu\text{C}_{18}$ -Ziptip (Millipore, Billerica, MA) pipette tip. The bound peptides in the ZipTip were eluted in gradient steps using 4  $\mu\text{l}$  of each 25%, 40%, 65% and 85% ACN in 0.1% TFA. Gradient fractions were then mixed 1:1 with following matrix solution: 20 mg/ml universal matrix in 1:1 ACN:H<sub>2</sub>O. For sample spotting a modified two-layer method was employed as described by Dai et al. (44). Briefly,  $\sim 1\mu\text{l}$  of a 12 mg/ml 4-HCCA solution of 80:20 v/v acetone:methanol was spotted onto the MALDI stainless steel target to form a thin first layer. As a second layer 0.5  $\mu\text{l}$  of the 1:1 peptide extract matrix mixture was spotted onto the dried first layer and air dried. The MALDI targets were analyzed with a Voyager DE-STR MALDI TOF MS (Applied Biosystems, Framingham, MA), located at the UBC Proteome Core Facility. The instrument was operated in positive reflectron mode. Calibration was done first externally with known peptide standards, before data analysis. Internal calibration was performed with known matrix cluster signals and tryptic autolysis peptide signals, to achieve a mass accuracy of less than 100 ppm. About 300-500 single laser shot spectra were accumulated per sample. Further confirmation of the peptide identities was performed by MALDI-TOF/TOF fragmentation analysis of selected tryptic or chymotryptic peptides as indicated in the text. The instrument used was a 4700 Proteomics Analyzer (Applied Biosystems, Framingham, MA) located at the UBC Biomedical Research Centre. The instrument was also operated in positive reflectron mode. Again, calibration was done first externally with known peptide standards, before data analysis.

## Immunoprecipitation

Post-nuclear supernatants from COS-7 cells transfected with 1µg pcDNA-HMGCS2-HA wild-type or 1µg pcDNA-HMGCS2-HA-Cys166Ser or 1µg pcDNA-HMGCS2-HA-Cys166,305Ser and primary hepatocytes lysed with RIPA 1% SDS buffer were incubated with 5 µg affinity purified rabbit anti-HMGCS2 from our laboratory for 2 hours at room temperature with rocking followed by incubation with 20 µl protein G sepharose. Following extensive washes the beads were then boiled 2 minutes in 1x SDS loading buffer containing 50 mM DTT and subjected to SDS-PAGE and Western blotting with chicken anti-HMGCS2 (Sigma-Aldrich) and ECL detection.

## References

- Dai, Y., Whittall, R.M., and Li, L. (1999) Two-layer sample preparation: a method for MALDI-MS analysis of complex peptide and protein mixtures. *Analytical chemistry* **71**: 1087-1091.
- Kostiuk, M.A., Corvi, M.M., Keller, B.O., Plummer, G., Prescher, J.A., Hangauer, M.J., Bertozzi, C.R., Rajaiah, G., Falck, J.R., and Berthiaume, L.G. (2008) Identification of palmitoylated mitochondrial proteins using a bio-orthogonal azido-palmitate analogue. *FASEB J* **22**: 721-732.
